# Supplementary material for: Protein solubilising and stabilising ionic liquids
Source: Royal Society of Chemistry journal article supplement (doi:10.1039/b508238b), 2005-01-01
Supplement: b508238b.pdf [file b508238b.pdf]

### Protein Solubilising and Stabilising Ionic Liquids

Kyoko Fujita,<sup>a</sup> Douglas R. MacFarlane\*<sup>a</sup> and Maria Forsyth<sup>b</sup>

<sup>a</sup> School of Chemistry, <sup>b</sup> Department of Materials Engineering, Monash University, Wellington Road, Clayton, VIC 3800, Australia.

Fax: +61-3-9905-4597; Tel: +61-3-9905-4535; E-mail: [D.MacFarlane@sci.monash.edu.au](mailto:D.MacFarlane@sci.monash.edu.au)

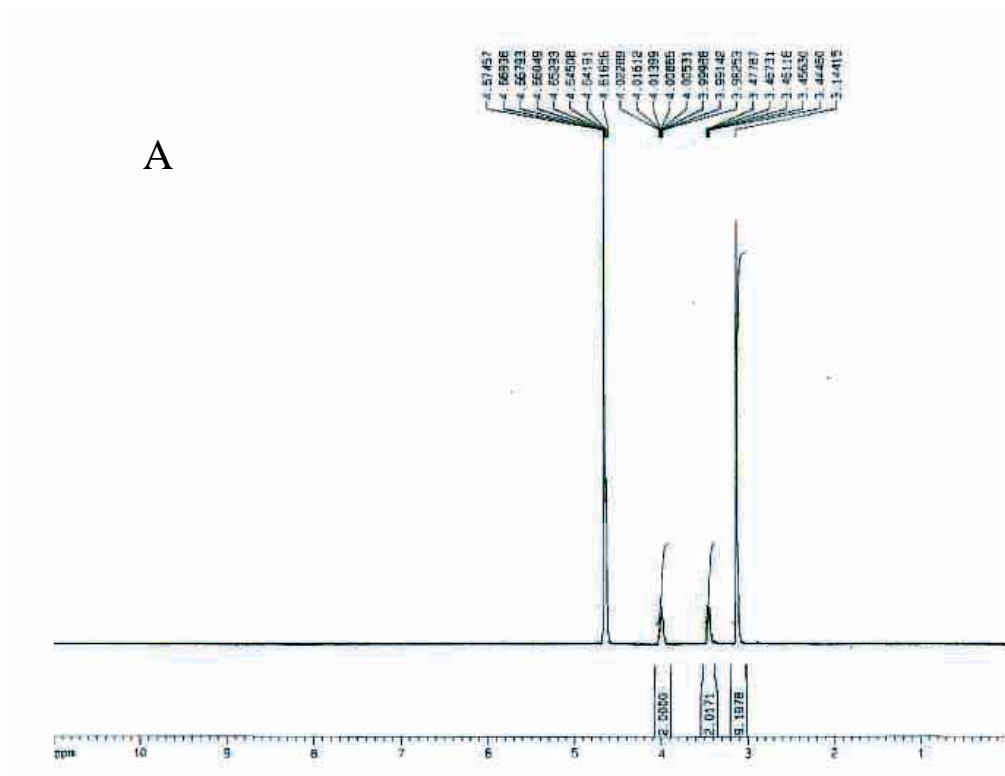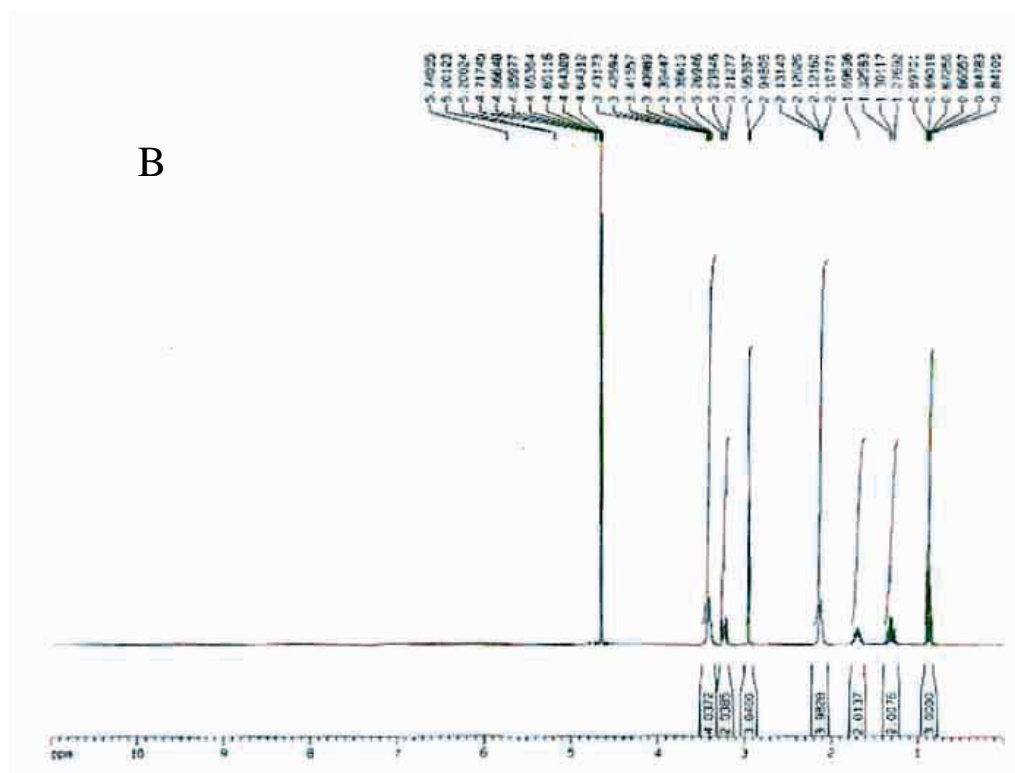

<sup>1</sup>H-NMR spectra of choline dhp (A) and p<sub>1,4</sub> dhp (B) in D<sub>2</sub>O (300 MHz).

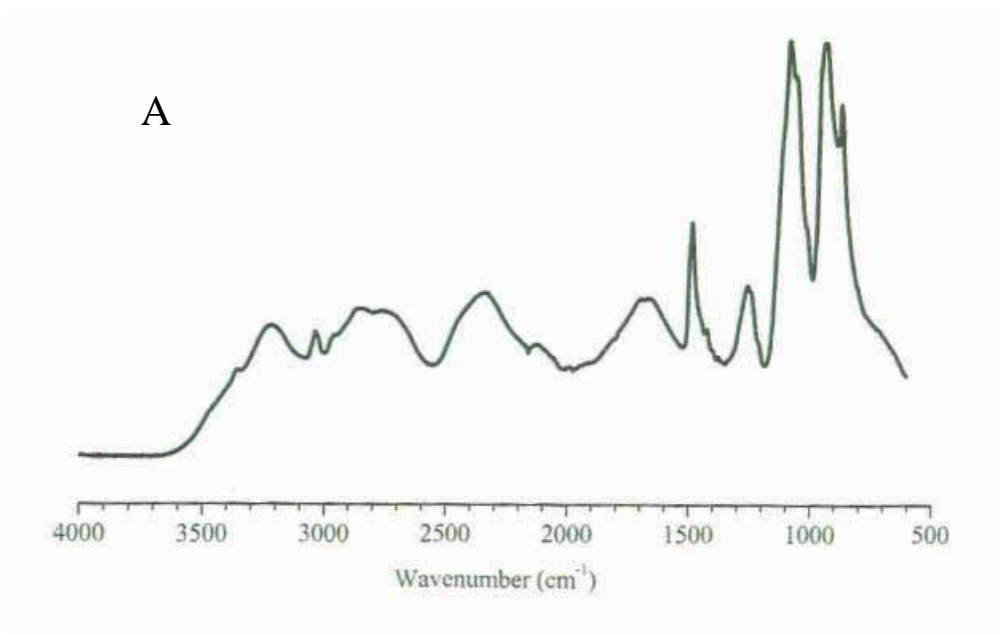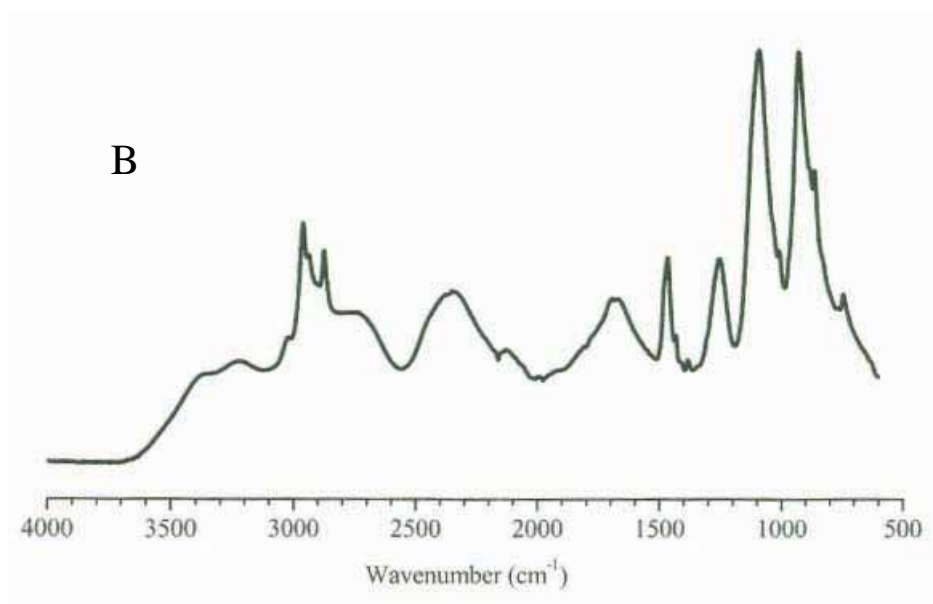

ATR-FTIR spectra of choline dhp (A) and p<sub>1,4</sub> dhp (B).
